# Supplementary material for: Genome-wide analysis of the Tritipyrum WRKY gene family and the response of TtWRKY256 in salt-tolerance
Source: Front Plant Sci. 2022 Dec 14;13:1042078. doi: 10.3389/fpls.2022.1042078 (PMC9795024; doi:10.3389/fpls.2022.1042078)
Supplement: Supplementary file 4 [file Table_2.xlsx]

## Sheet: Sheet1
Supplementary Table S2 : Primers used in qRT-RCR experiments
Probe ID	Forward primer (5'-3')	Reverse primer (5'-3')
TtWRKY16	GCT CCA CTC TCC CGT TCT CCT C	GCC GAC CTC ATC CTG CTG AAA G
TtWRKY49	AAC TCT ACG GCG AGG ACG ACA C	GGT AGT CGG TGA TGG TGG AGT AGG
TtWRKY93	TCG GAC AAG GAC CCA GGA TTC G	GTA TCT CCT TCT GCC CGT ACT TGC
TtWRKY98	GCT GCT AAC ACC CAA CTC ATC GG	CCT TCC CAT CCT CCT GGT CAT CC
TtWRKY100	GCC GTC AAG AAC AGC CCA TAT CC	ACC GCT CCA CCC TCT TCT TCA C
TtWRKY110	AGA AAT TCG ATC ACC ACC AGC AAG G	GCT CGT TCT CCT CCC TCA CCT C
TtWRKY115	CGA CGT TAG GAG CCA TGA CCA AG	GGA CGA GAA AGA CAC CGA TGA GTT G
TtWRKY118	TCA CCT ACT CCT ACG AGC ACA ACC	ATG GTG CGT GCC GTC AGA TTT C
TtWRKY128	TCA GGA GGA TGG CAA GAA CGA GAG	TGG ACG AGT TGG ACG GCT CTT C
TtWRKY133	GCC GTC AAG AAC AGC CCA TAT CC	ACC GCT CCA CTC TCT TCT TCA CC
TtWRKY136	TAC AGG TGC AGT AGC TCG AAG GG	AGT GGT TGT GCT CGT AGG AGT AGG
TtWRKY143	GCG AGC AGC CGA CAT TCC TAA C	GTC CAC TGA AAC TGG TGA CCG TAA G
TtWRKY147	TGG CAA GCA AGA CCG AGA AGA AC	CTC CAC TGG CAC CCA TCA TTC ATC
TtWRKY150	AGC GAG CAC AAC CAA CCA ACA G	CCT GCC GAT GGT GAT GTG TCT G
TtWRKY154	GCG AGC AGC CGA CAT TCC TAA C	GTC CAC TGA AAC TGG TGA CCG TAA G
TtWRKY187	CCA CCA CCA GAC CTC CTT CCA G	TGC TGA GTT GAC ACG AAC GAC ATC
TtWRKY209	CCT GAG GTT GCG GTT CTT GAG TC	CCG TGA CCA TGT CGG TGA ACT G
TtWRKY211	TGG AGA GAA GGA TAG GCG GTG ATA C	GAA GAA GTC GTC CTG CTG GTG ATA G
TtWRKY214	CCT GAG GTT GCG GTT CTT GAG TC	CCG TGA CCA TGT CGG TGA ACT G
TtWRKY219	GAG GTT GCG GTT CTT GAG TCT GAG	CCG TGA CCA TGT CGG TGA ACT G
TtWRKY221	CCA GCA CAA GCC AGT CGT CAA G	TCC TTC TCT CCA TTT CTG CCT CCT C
TtWRKY223	GAG AAC GAG AGG CTG AAG ATG ATG C	CTT GCC CTT GCT GGT GGA GAA C
TtWRKY224	AGG AGG CTC AAG AAG ACA AGA TTG C	TTG CTG GTG GAG AAC ATC GAA CTG
TtWRKY243	GAA CGA GAG GCT GAA GAC GAT GC	GCC CTT GCT GGT GGA GAA CAT C
TtWRKY244	GAG CAG GCA GAA CAT GGG AGA AG	CGC ACC TTC GTC TCA CTT CCA TC
TtWRKY245	CTA GCA CGA GCA GGC AGA ACA TG	GCA GCC CGA TGA AAG TCC AAG AG
TtWRKY251	GAG TGG GCG AGG AGA ACA GGA G	GGA CGA CTG GTG GTG GTT GTT G
TtWRKY252	CGT CGT GCC AGG TGA AGA AGA AG	ACT TCC TAC CGC CAG AGC CTT G
TtWRKY256	ACG CCA CGG TCA ACG ATC AAA C	TGC TGC TCT TGT TGC TCA CTT CTA C
TtWRKY281	ATT TCT ATC CTC AAC CAC CGC ACT G	ACC TCG ACG AAG ACG ACC TCA C
TtWRKY289	TCC CGT CCA CGC AAA GAA ATT CG	GCT CGT TCT CCT CCC TCA CCT C
TtWRKY299	TCA CCT ACT CCT ACG AGC ACA ACC	ATG GTG CGT GTC GTC GGA TTT C
TtWRKY306	CAA CTC CAA CTT CCC GAG GTT CTA C	GGT CGC TCA TGT CCT TCT GCT G
TtWRKY1	TCC TTT CAC GCA GTC AAG TCC AAC	TGC TGC TGC TCT TGT TGC TCA C
TtWRKY4	GTA CGG GCA GAA GCA GAT GAA GG	TGT AGA CGA TCT CGG TGA CCT GAC
TtWRKY32	CAG CAG CAA CAA CAA CAA GTG GTA G	ACT TCC TCC AGT TGT ATC CGT CCT C
TtWRKY43	GGA CGA GGA CGG AGA TCG AGA TC	TTT GGG CTG TTC TTG ACG GAC TTC
TtWRKY51	CAG GAG CGA GAA GAA GAA GAC GAA G	ACC TCA CTC TTG GTT GCG AAT GC
TtWRKY70	GCC CTT CAG GAC CAA CAC CAA G	TGT CCT TCT GCC CGT ACT TCC TC
TtWRKY79	GCA GCC ATG ACC ATC TCC ATC AC	GCA CCA TCA TCA CCA CCA CCA TC
TtWRKY106	GAG GAG GAG AGA CGG TGG TGA C	GAT GTC GAT GTC GCT CAT GGT CTG
TtWRKY112	CAC GAG GAT GGC AAG AAC GAG AG	TGG ACG AGT TGG AGG GCT CTT C
TtWRKY121	GGA CGA CGA CAA CGG TGT AAG C	CGT CAC CAC TGT CTC TCC TCC TC
TtWRKY132	AGG TGA GGG TGA ATT CCG TGG AG	ACC GAG GAT GTC CTT CTG ACC ATA C
TtWRKY138	GAG GTA GCC GTG AGG GTA GTA GC	CCA CCA TGA AGT CCA GTC CCA ATC
TtWRKY141	GCC GCA GCA AGT ACC ACT ACA G	TGC CGC AGC TCT TGA TCT TCA TC
TtWRKY186	CGT TCC TGA CAT CTC TGA GCA TGG	TTG CCG ATA CAC CTC CTC CTC TG
TtWRKY203	CTG GCA AGG GTG TCA ACC TCA AG	GCT CAG AGA TGT CAG GAA CGA ACG
TtWRKY232	CGT CGT GCC AGG TGA AGA AGA AG	GTG GTT GTG ATC GCC GTC GTA C
TtWRKY240	AAT GGC GGA AAT ACG GGC AGA AG	CCT TCT TCT TCA CCT GGC ACG AC
TtWRKY241	GAG TGG GCG AGG AGA ACA GGA G	CGA CGA CTG GTG GTG GTT GTT G
TtWRKY254	CGT CGT GCC AGG TGA AGA AGA AG	GTG GTT GTG ATC GCC GTC GTA C
TtWRKY294	GAG GCG GAT GAC CAG GAG GAT G	TCG CTC TTG GTG AGG AAG GAG AC
TtWRKY302	TTC GGC TTC AAC GGC AAC TTC G	CTG CTG GTG CTG GCT CAT GTA C
TtWRKY322	TCC AAG ATC AGC AGC GGC AAT G	CTG TCA AAG AGA GGC ATG GGC TTC
